# Supplementary material
Source: PubMed Central journal article supplement (PMC3049368)
Supplement: JCI41940sd.pdf [file JCI41940sd.pdf]

**A**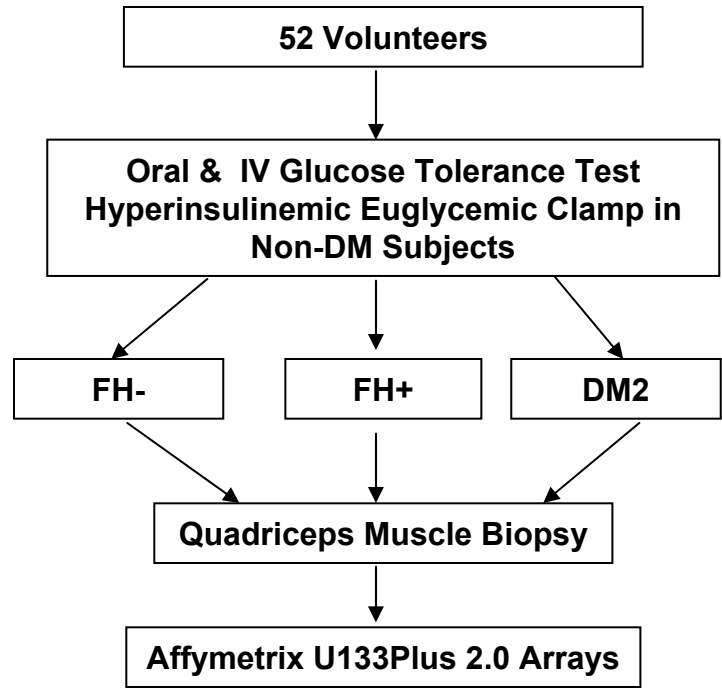**B**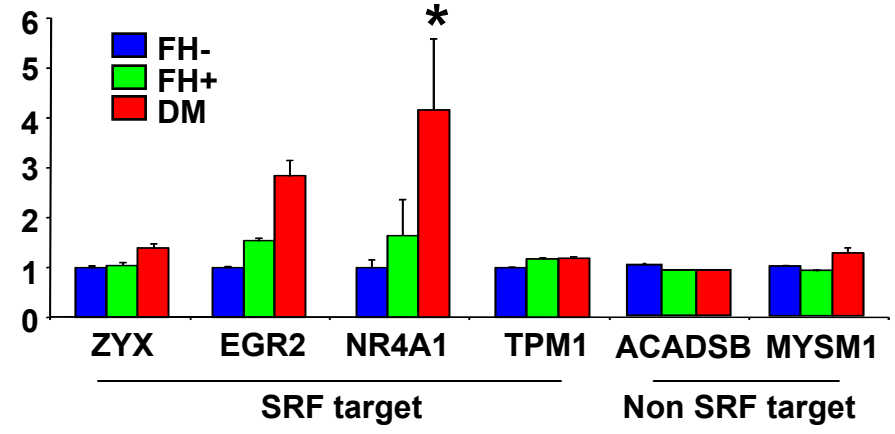**C**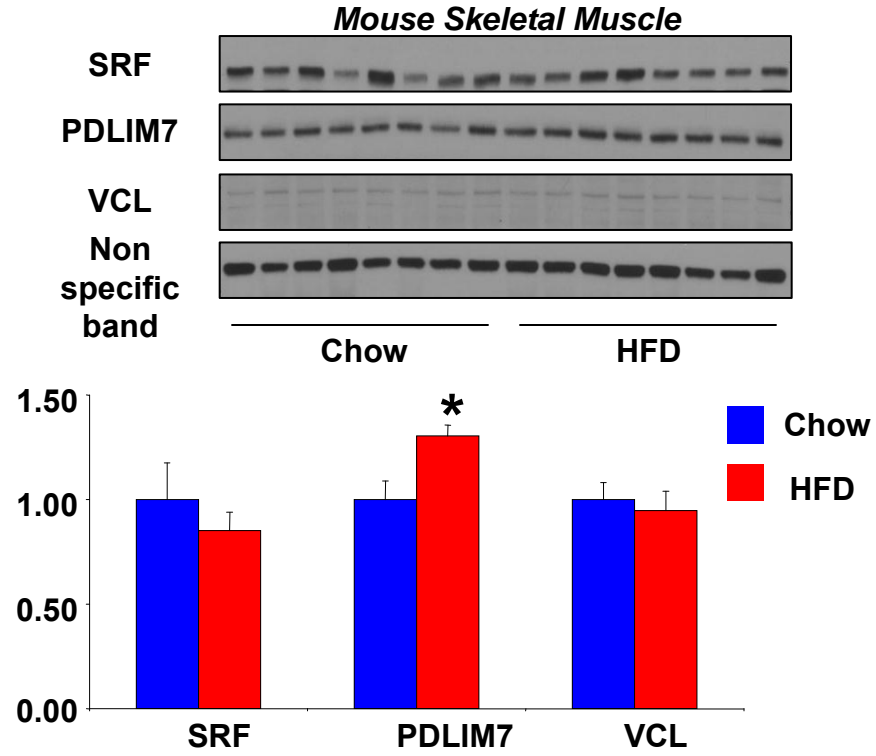

Control  
MIRKO

### SRF Target Gene Expression in MIRKO Mice

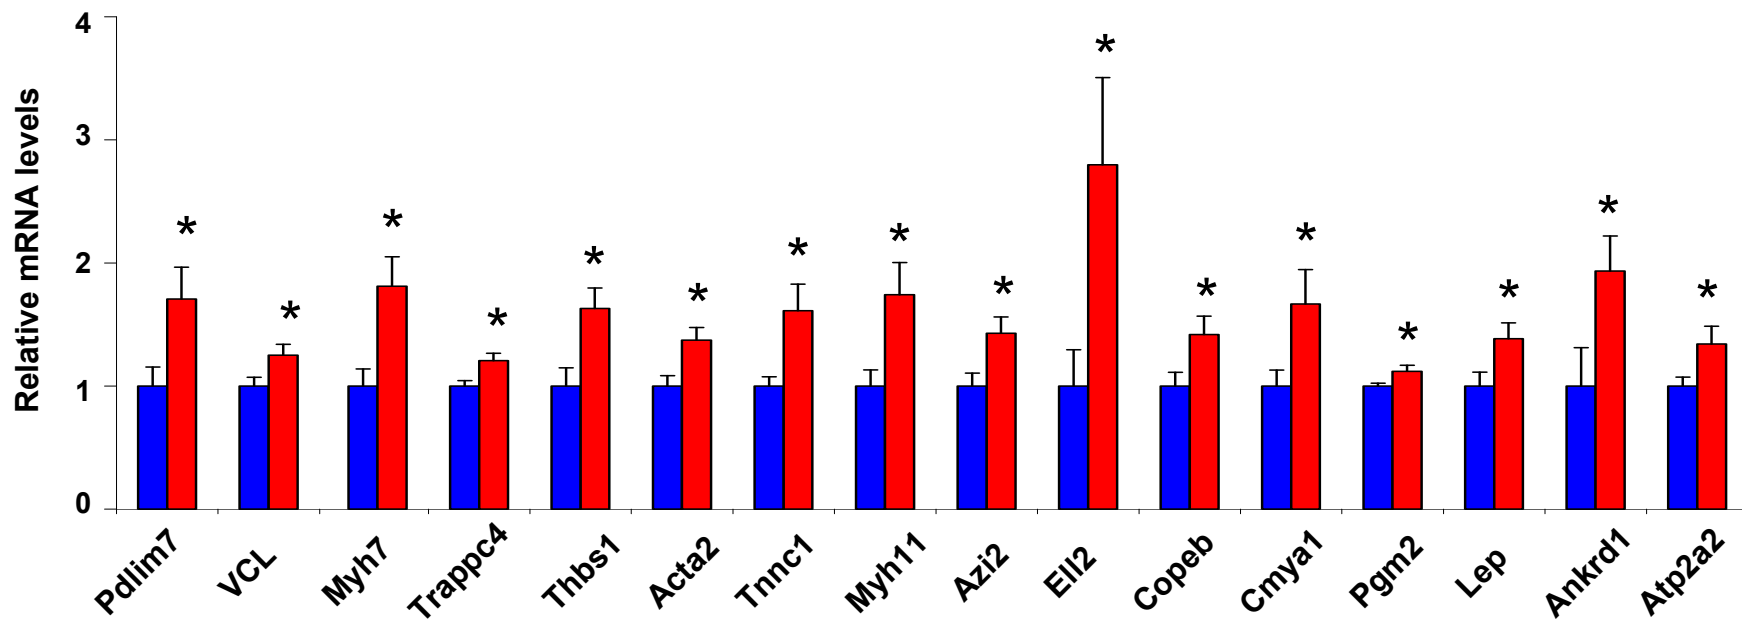

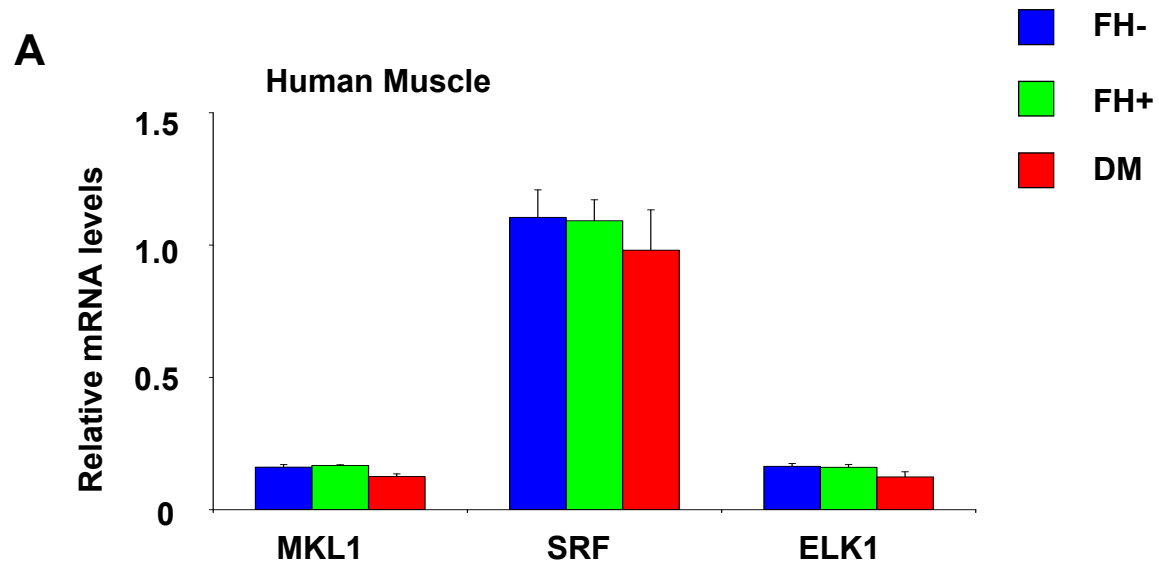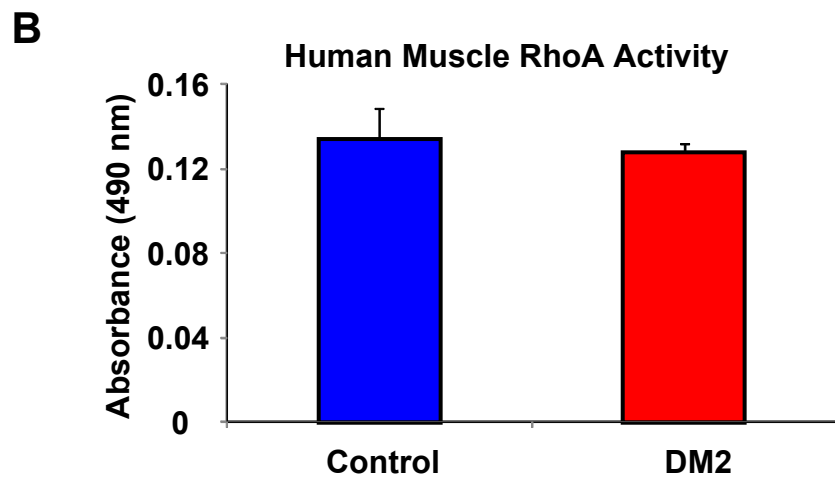

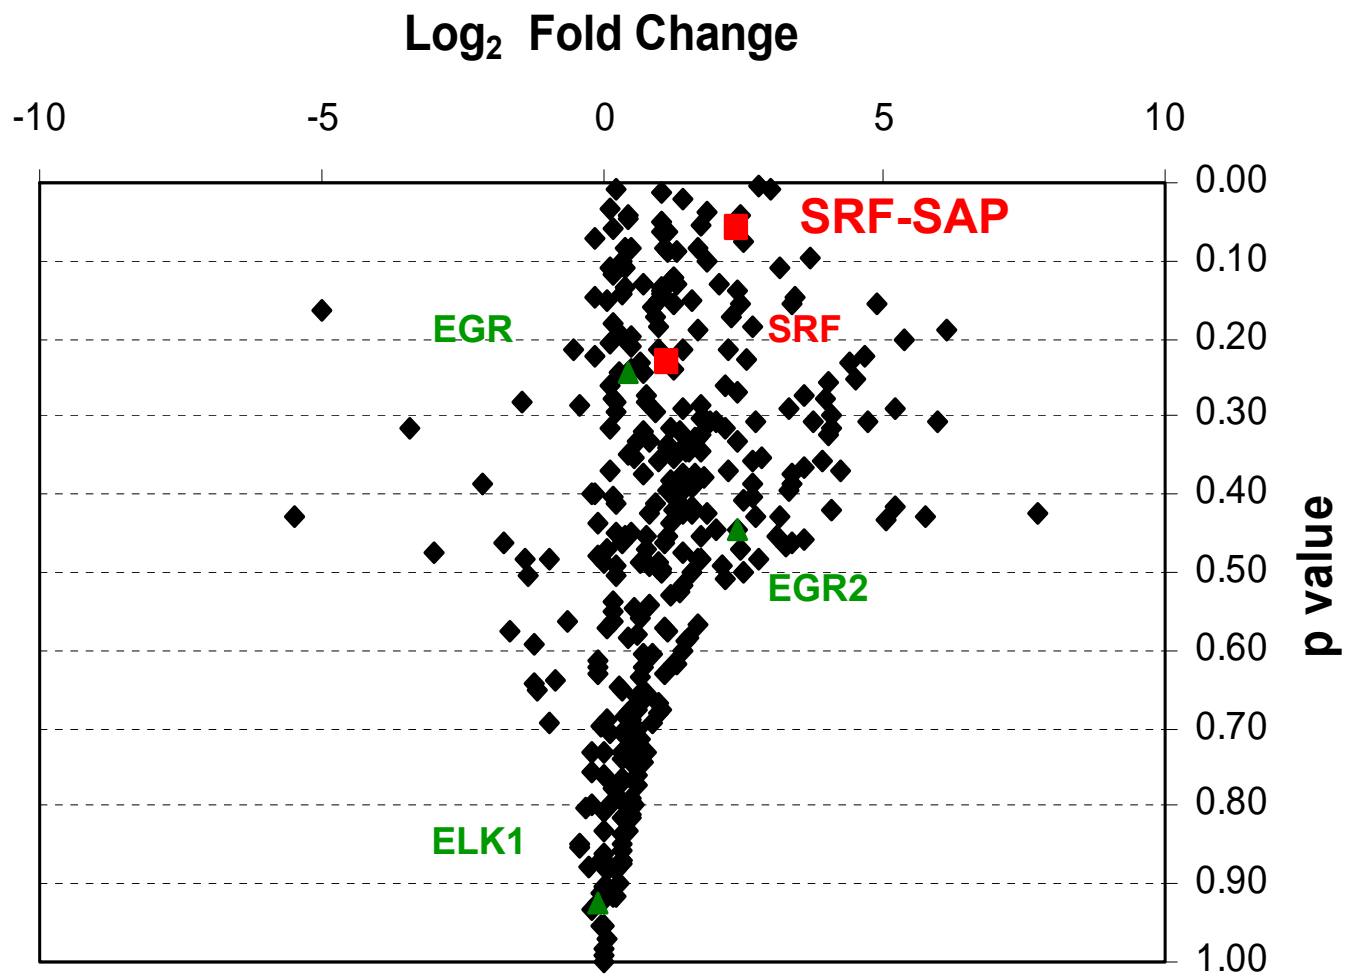

**A**

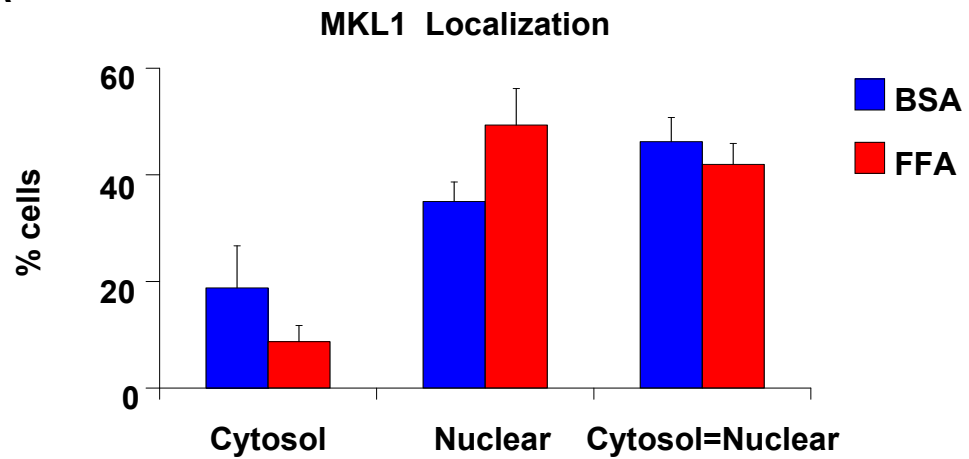

**B**

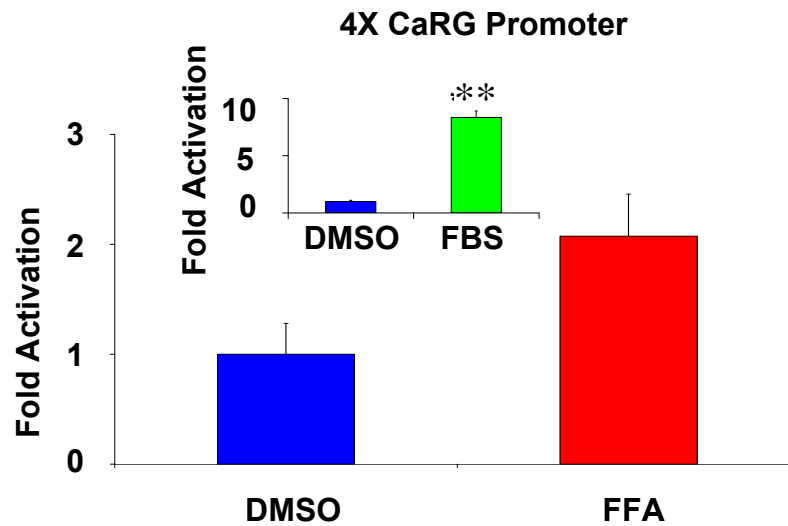

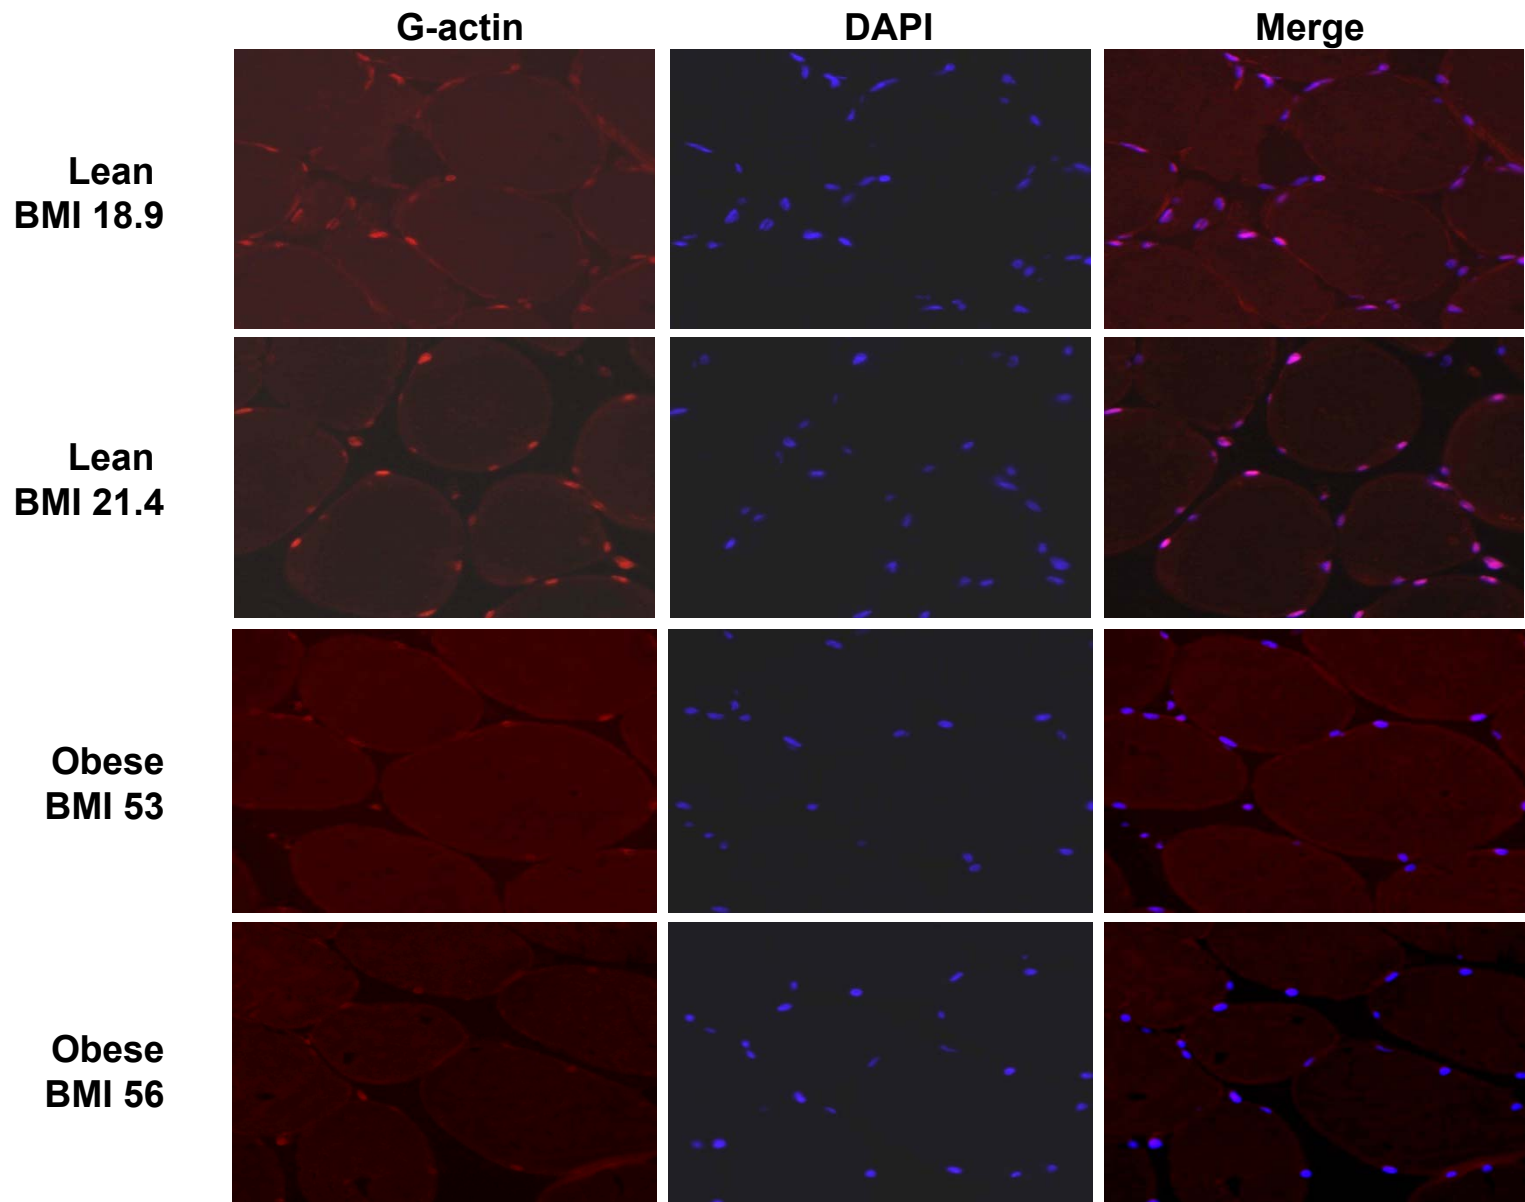

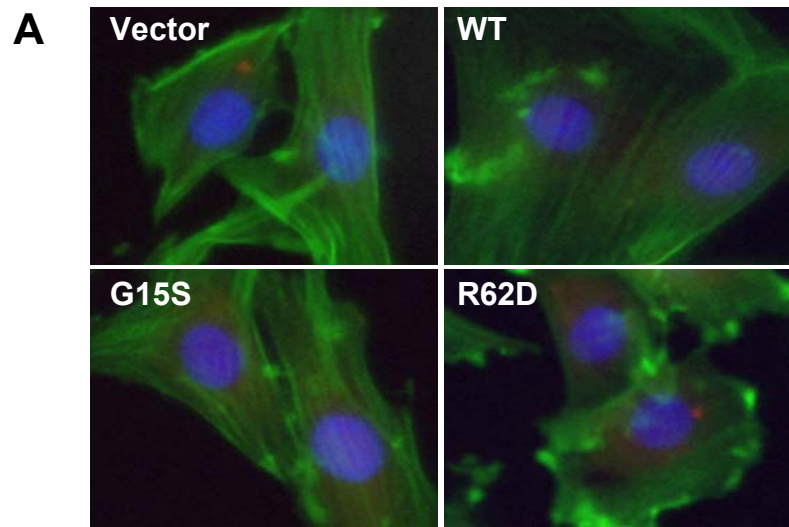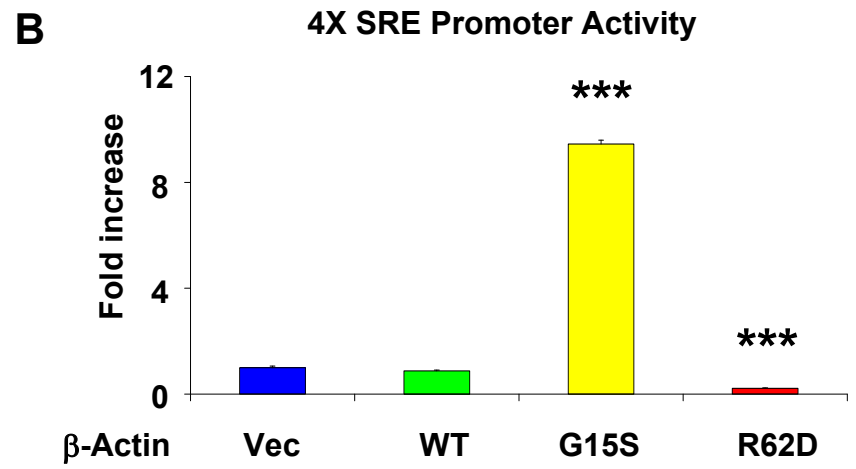

**A. Glucose Uptake:  
Effect of Constitutively Nuclear MLK1**

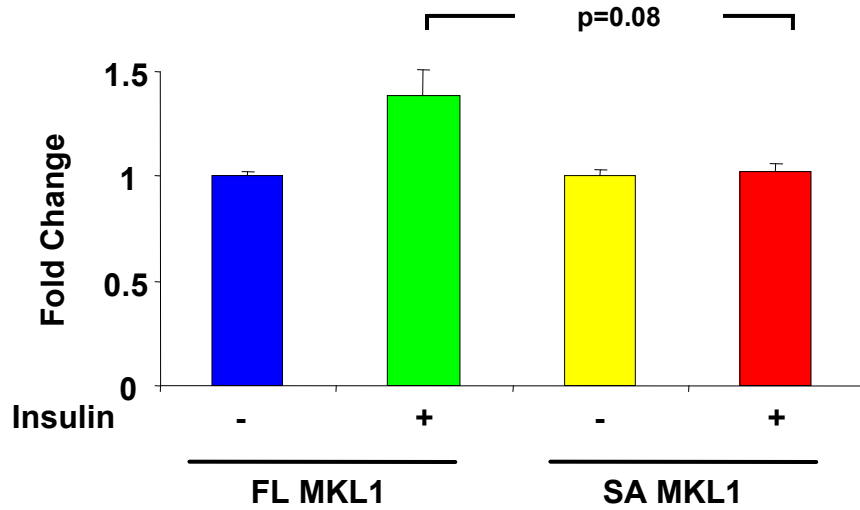

**B. Glucose Uptake:  
Effect of siRNA Targeting MLK1**

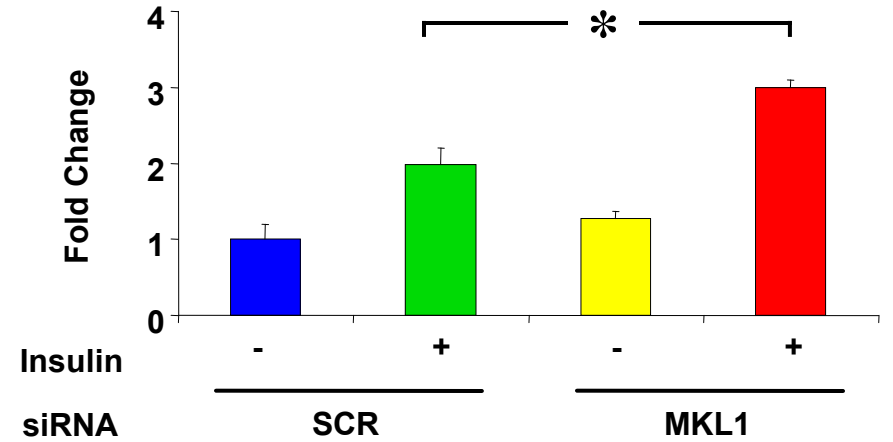



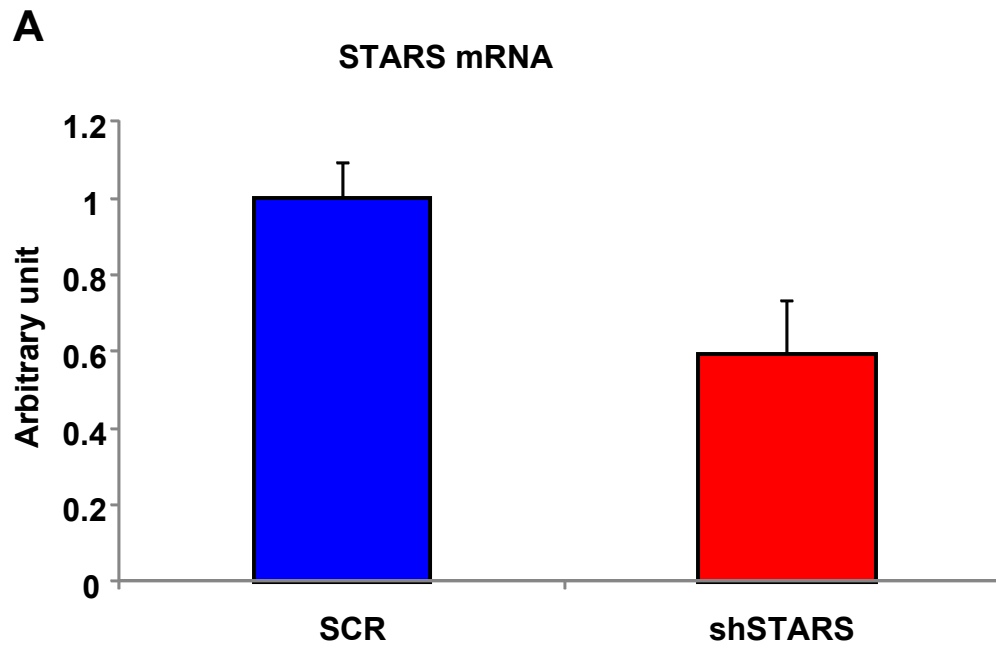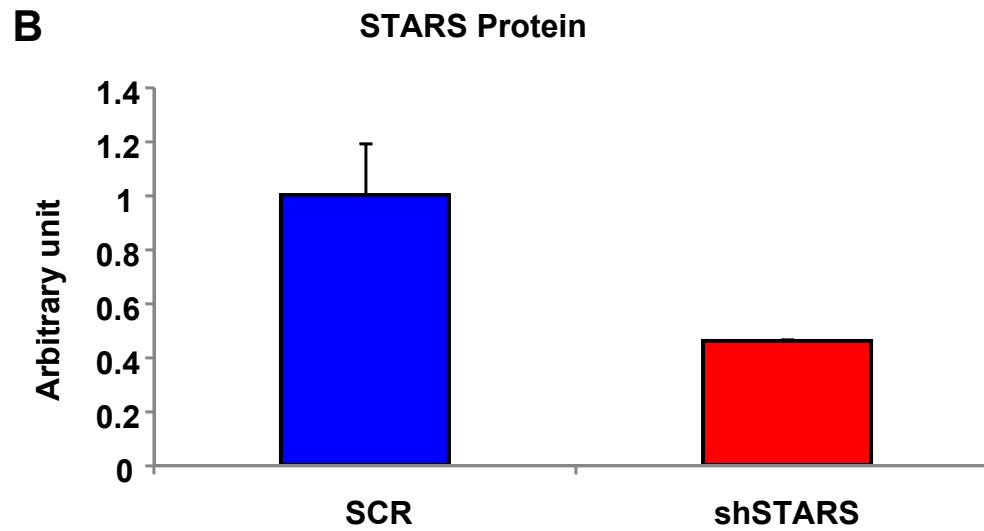

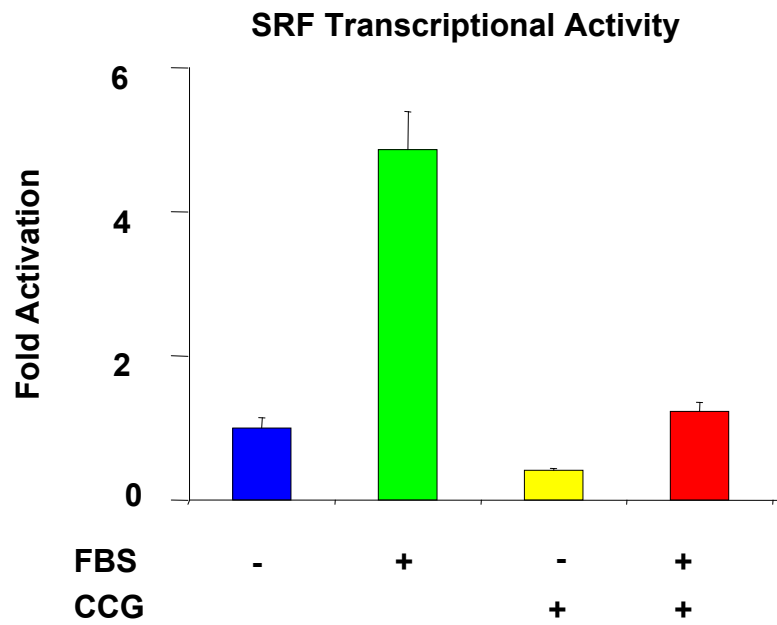

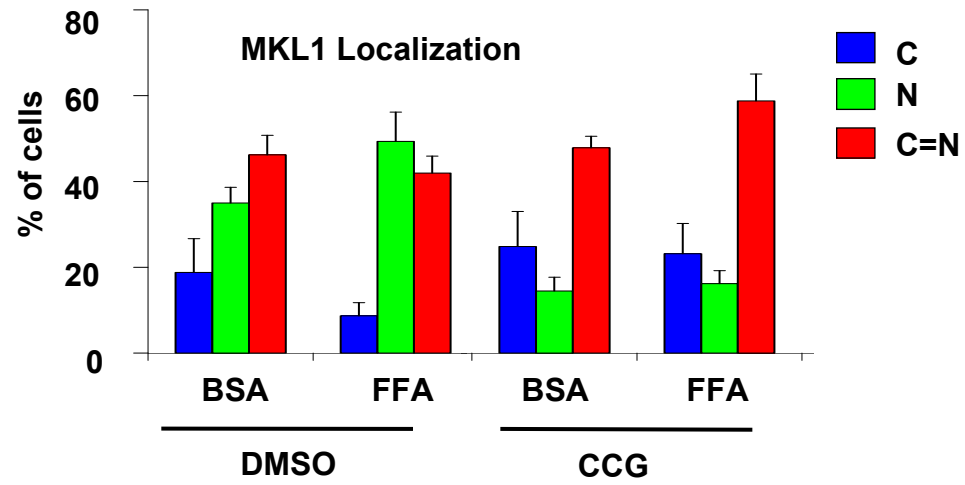

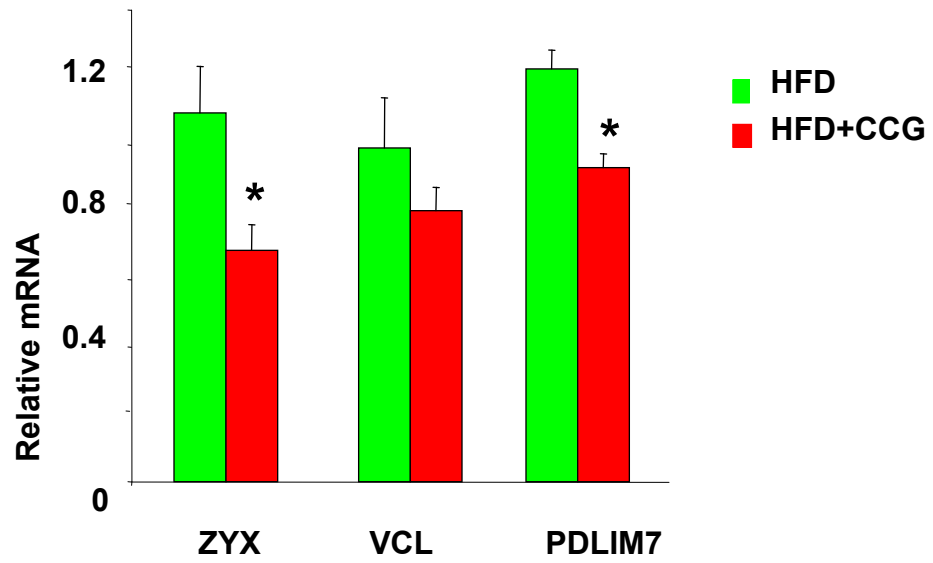

**Supplementary Table 1. Clinical data (rectus abdominis muscle samples)**

|                                 | <b>Control</b> | <b>Obese<br/>(Insulin Resistant)</b> |
|---------------------------------|----------------|--------------------------------------|
| <b>Age</b>                      | 32.3 ± 4.2     | 32 ± 3.3                             |
| <b>BMI (kg/m<sup>2</sup>)</b>   | 23.9 ± 2.4     | 49.8 ± 2.7                           |
| <b>Hgb A1c</b>                  | 5.1 ± 0.1      | 5.2 ± 0.1                            |
| <b>Fasting glucose (mM)</b>     | 4.5 ± 0.3      | 5.1 ± 0.1                            |
| <b>Fasting insulin (pmol/L)</b> | 102.8 ± 5.6    | 206.9 ± 7.6 #                        |
| <b>Cholesterol (mg/dL)</b>      | 209 ± 25       | 219 ± 31 #                           |
| <b>HDL (mg/dL)</b>              | 48 ± 6         | 44 ± 3 #                             |
| <b>LDL (mg/dL)</b>              | 142 ± 21       | 157 ± 23                             |
| <b>TG (mg/dL)</b>               | 98 ± 27        | 135 ± 30                             |

**Supplemental Table 2. Clinical data (human myotube donors)**

|               | <b>Number</b> | <b>Age<br/>(years)</b> | <b>BMI<br/>(kg/m<sup>2</sup>)</b> | <b>Fasting<br/>Glucose<br/>(mg/dl)</b> | <b>Family<br/>History</b> |
|---------------|---------------|------------------------|-----------------------------------|----------------------------------------|---------------------------|
| <b>Normal</b> | <b>8</b>      | <b>48.0 ± 3.4</b>      | <b>27.1 ± 1.6</b>                 | <b>94.9 ± 6.9</b>                      | <b>1/8</b>                |
| <b>DM2/IR</b> | <b>6</b>      | <b>59.7 ± 3.3 *</b>    | <b>33.4 ± 3.6</b>                 | <b>109.8 ± 11.4</b>                    | <b>3/6</b>                |

**Supplemental Table 3. Ontology Assessment of SRF Target Genes Altered in T2DM**

| <b>GO Term</b>                              | <b>Count</b> | <b>%</b> | <b>p Value</b> | <b>Fold Enrichment</b> | <b>Bonferroni</b> | <b>Benjamini</b> | <b>FDR</b> |
|---------------------------------------------|--------------|----------|----------------|------------------------|-------------------|------------------|------------|
| GO:0044449~contractile fiber part           | 10           | 20       | 1.04E-10       | 25                     | 0.000             | 0.000            | 0.000      |
| GO:0043292~contractile fiber                | 10           | 20       | 1.94E-10       | 24                     | 0.000             | 0.000            | 0.000      |
| GO:0030016~myofibril                        | 9            | 18       | 2.84E-09       | 23                     | 0.000             | 0.000            | 0.000      |
| GO:0003779~actin binding                    | 12           | 24       | 9.47E-09       | 10                     | 0.000             | 0.000            | 0.000      |
| GO:0030017~sarcomere                        | 8            | 16       | 3.26E-08       | 24                     | 0.000             | 0.000            | 0.000      |
| GO:0015629~actin cytoskeleton               | 10           | 20       | 2.07E-07       | 11                     | 0.000             | 0.000            | 0.000      |
| GO:0008092~cytoskeletal protein binding     | 12           | 24       | 8.61E-07       | 7                      | 0.000             | 0.000            | 0.001      |
| GO:0030029~actin filament-based process     | 9            | 18       | 1.55E-06       | 10                     | 0.001             | 0.001            | 0.002      |
| GO:0006928~cell motion                      | 11           | 22       | 3.89E-06       | 7                      | 0.003             | 0.002            | 0.006      |
| GO:0005856~cytoskeleton                     | 16           | 32       | 9.73E-06       | 4                      | 0.001             | 0.000            | 0.012      |
| GO:0005925~focal adhesion                   | 6            | 12       | 2.26E-05       | 17                     | 0.003             | 0.000            | 0.027      |
| GO:0005924~cell-substrate adherens junction | 6            | 12       | 2.72E-05       | 16                     | 0.004             | 0.001            | 0.032      |
| GO:0031674~I band                           | 5            | 10       | 3.40E-05       | 26                     | 0.005             | 0.001            | 0.041      |
| GO:0030055~cell-substrate junction          | 6            | 12       | 3.55E-05       | 15                     | 0.005             | 0.001            | 0.042      |

**Supplemental Table 4. Primer Sequences for qRT-PCR.**

| <b>HUMAN</b> | <b>REVERSE PRIMER</b>          | <b>FORWARD PRIMER</b>             |
|--------------|--------------------------------|-----------------------------------|
| CTNNA2       | 5'-CCCTGTATCTCCTAGGCATCAAGA-3' | 5'-ACTGCACTTTGCCTCCATCAGGTA-3'    |
| EGR2         | 5'-TGCCCATGTAAGTGAAGGTCTGGT-3' | 5'-ACGTCGGTGACCATCTTTCCCAAT-3'    |
| ELK1         | 5'-TTGGCATGGTGGAGGTAACAGACA-3' | 5'AAGAACATCATCCGCAAGGTGAGC-3'     |
| MKL1         | 5'-GCACAGGGCTGATTTGGTCTTGAT-3' | 5'AGAGCTGAAGCAGGAGCTGAAGTT-3'     |
| MYSM1        | 5'-TCAAATTAGGCTAGTAAGGTGGGA-3' | 5'-GCTTATTCTCTAGATTGTCAGTACCGT-3' |
| NR4A1        | 5'-AGTCCTTGTTAGCCAGGCAGATGT-3' | 5'-TCCATGCCAGCATTATGGTGTCCG-3'    |
| PDLIM7       | 5'-GTTTATTCCATGCCCAAGGCAGCA-3' | 5'-TTCATCTGACACTGCCTTCCCTCT-3'    |
| SRF          | 5'-AGAGGTGCTAGGTGCTGTTTGGAT-3' | 5'-TGAGTGCCACTGGCTTTGAAGAGA-3'    |
| STARS        | 5'-TCGTAAGTCTTGCTGACCACCGTT-3' | 5'-ATGGACAAAGCTCAGAGAAAGCCC-3'    |
| TPM1         | 5'-TCAGCTTGTCGGAAAGGACCTTGA-3' | 5'-GGCAAATGTGCCGAGCTTGAAGAA-3'    |
| VCL          | 5'TAGACCACTTGGTAGCTTCCCGAT-3'  | 5'-GTTAATGCCATCCAATCAGCCGGT-3'    |
| ZYX          | 5'-GCAGCCATTGTCATCTGCCTCAAT-3' | 5'-CCCTGGACAAGAACTTCCACATGA-3'    |
| <b>MOUSE</b> |                                |                                   |
| PDLIM7       | 5'-TCATCCGGGTCTTGCATGAACTCT-3' | 5'-AGGTGCAGACCTCTGACAAACAGT-3'    |
| STARS        | 5'-AGACGAGATGGCAAGATCCAGGTT-3' | 5'-ATCAGCGGTGAGTGGATTTGTTGC-3'    |
| VCL          | 5'-AGCATAGTGGCCTTCACTGTGGAT-3' | 5'-AAGGATATCGCCAAGGCCTCTGAT-3'    |
| ZYX          | 5'-TGGAAGGAGGTCCATCTCAACTCA-3' | 5'-AAGTGTGAGGACTGTGGGAAACCT-3'    |



## Supplementary Information Figure and Table Legends

**Supplementary Figure 1.** (A) Volunteers were recruited based on established diabetes (T2D) or diabetes family history (FH+, one or two parents with T2D), with FH- subjects (no T2D in first-degree relatives) as controls. Quadriceps muscle biopsies were performed, and RNA extracted for expression analysis using Affymetrix U133 2.0 Plus arrays. (B) qRT-PCR analysis of expression of additional SRF target genes in human skeletal muscle. \*  $p < 0.05$ . (C) SRF target protein expression in quadriceps muscle of mice fed either chow or HFD (upper panel) and quantification (lower panel).

**Supplementary Figure 2.** Expression of representative SRF target genes is significantly increased in muscle from muscle-specific insulin receptor knockout (MIRKO) mice. Data were obtained from Affymetrix U74Av2 expression arrays (n=8 for lox control, n=7 for MIRKO), \*  $p < 0.05$

**Supplementary Figure 3.** (A) mRNA expression of SRF and its cofactors MKL1 and ELK1 does not differ in muscle from either FH+ or T2D, as compared with FH- subjects (n=15 FH-, 25 FH+, 11 T2D). (B) RhoA activity was measured in rectus abdominus muscles from control subjects undergoing elective cholecystectomy (n=4) or obese subjects undergoing gastric bypass surgery with or without T2D (n=4).

**Supplementary Figure 4.** Analysis of DNA-binding arrays (purchased from Panomics, Fremont, CA) hybridized as per manufacturer's protocol with nuclear extracts derived from control individuals vs. subjects with T2D (n=3 per group). X-

axis demonstrates  $\log_2$  fold change of intensity (T2D/control), while y-axis demonstrates p value for between-group comparison. Note that SRF-SAP indicates oligonucleotide GTTCCGAAAGTTGCCTTTTATGG; sequence is derived from  $\beta$ -act in proximal SRE with flanking Ets motif sequence (Treisman,R., Marais,R., and Wynne,J. 1992. Spatial flexibility in ternary complexes between SRF and its accessory proteins. *EMBO J* 11:4631-4640). .

**Supplementary Figure 5.** A. MKL1 translocates to the nucleus in cells incubated with the saturated fatty acid palmitate. Graph presents results of scoring (by a blinded observer) of MKL1 localization in C2C12 myoblasts treated with either BSA or FFA (palmitate, 16:0, 250  $\mu$ M, conjugated to BSA, for 16 hours). C: cytosol, N: nucleus, C=N: equal localization to cytosol and nucleus. An average of 100 cells per condition was counted. B. Palmitate activates the SRE, as demonstrated by luciferase activity using the 4X CARG construct; inset demonstrates serum-stimulated effect, for comparison.

**Supplementary Figure 6.** G actin staining (DNase I, Texas Red) is reduced in muscle from humans with obesity compared to lean controls undergoing elective abdominal surgery (representative photos from total of 5 subjects per group).

**Supplementary Figure 7. Effects of  $\beta$ -actin mutants.** (A) Overexpression of mutant  $\beta$ -actin in L6 myoblast. Note that R62D mutant expression was associated with reduced filamentous actin. (B) G15S mutant stimulates, but R62D mutant significantly suppresses SRF promoter activity.

**Supplementary Figure 8.** MLK1 localization and expression modulates basal and insulin-stimulated glucose uptake. L6 myoblasts expressing Myc-tagged GLUT4 were transfected with: (A) either full-length (FL) or constitutively nuclear MLK1 (SA), or (B) scrambled siRNA or siRNA targeted against MKL1. Cells were differentiated for 3 days prior to glucose uptake assay in 6 well plates. N= 5-6 per condition.

**Supplementary Figure 9.** Quantification of efficiency of shSTARS to reduce expression at both mRNA (A) and protein levels (B) (n=3 per group).

**Supplementary Figure 10.** CCG 1423 represses serum-induced SRF transcription activity (n=3 per group).

**Supplementary Figure 11.** CCG-1423 alters localization of MKL1 in both basal and 0.5 mM palmitate-treated cells. CCG-1423 reverses MKL1 nuclear accumulation. C: cytosol, N: nucleus; C=N: equal localization to cytosol and nucleus. An average of 115 cells were counted per condition.

**Supplementary Figure 12.** Expression of SRF target genes (e.g. ZYX, VCL, PDLIM7) in quadriceps muscle significantly decreases after CCG-1423 administration. N=7 per group.

**Supplementary Table 1.** Demographic data for human subjects from whom rectus abdominus samples were obtained for G-actin staining demonstrated in Supplementary Figure 5. n=5 per group.

**Supplementary Table 2.** Demographic data for subjects from whom primary myotubes were isolated (n=8 for controls, 6 for IGT/DM).

**Supplementary Table 3.** Gene ontology analysis of 54 SRF-regulated genes (Figure 1A). Analysis was performed using DAVID (<http://david.abcc.ncifcrf.gov/>).

**Supplementary Table 4.** Primer sequences used for qRT-PCR.
